# Supplementary material for: Saccharification of Lignocelluloses by Carbohydrate Active Enzymes of the White Rot Fungus Dichomitus squalens
Source: PubMed Central journal article supplement (PMC4682842; doi:10.1371/journal.pone.0145166), 2015-12-14

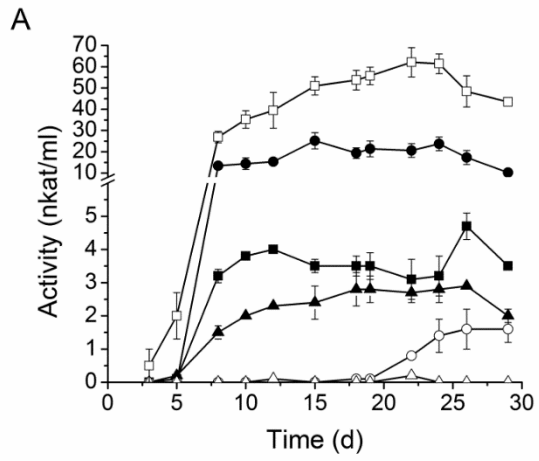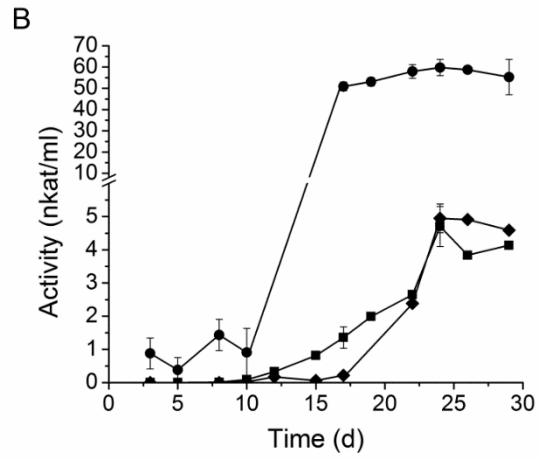

Supplement: pone.0145166.s001.pdf [file pone.0145166.s001.pdf]
